# Supplementary material for: Tolerance to NADH/NAD+ imbalance anticipates aging and anti-aging interventions
Source: PubMed Central journal article supplement — iScience. 2021 Jun 8;24(7):102697. doi: 10.1016/j.isci.2021.102697 (PMC8239738; doi:10.1016/j.isci.2021.102697), 2021-06-08

**iScience, Volume 24**

**Supplemental information**

**Tolerance to NADH/NAD<sup>+</sup> imbalance anticipates  
aging and anti-aging interventions**

**Alvar J. Alonso-Lavin, Djordje Bajić, and Juan F. Poyatos**

# 1 **Supplementary Methods**

## 2 **Methods S1, related to STAR Methods**

3 Flux balance analysis is a widely used approach for studying biochemical networks. The  
4 first step of FBA consists on representing metabolic reactions in the form of a tabulation,  
5 a matrix  $S$ , of the stoichiometric coefficients of each reaction. This is a matrix in which  
6 each row represents a particular metabolite, like NADH, and each column represent a  
7 specific metabolic reaction. In addition to this matrix, the flux through all of the reactions  
8 in the metabolic network is represented by a vector  $v$ . In this way, the change of each  
9 metabolite is given by the product of  $S$  and  $v$  ( $dx/dt = Sv$ ).

10  
11  
12 While this actual value is not accessible by definition of the method that only considers  
13 steady-state, i.e.,  $dx/dt = 0$ , and that exclusively provides fluxes in steady state that  
14 satisfy the mass balance constraints provided by  $S$ ; the framework also reduces  
15 drastically the quantity of information necessary to build the model.

16  
17 To still manage to simulate an imbalance in the ratio between two metabolites in a  
18 significant manner in a framework where the actual value cannot be known, we modified  
19 the production or consumption of each metabolite in a way that it was immediately and  
20 unequivocally rerouted to the other.

21  
22 A similarly important and counter intuitive hallmark of the study, the analysis of  
23 homeostatic nutrients, works around natural flux balance analysis limitations by  
24 calculating the amount of a metabolite that is used by enzyme pools per unit of time,  
25 rather than the total amount concentration that is made available during that time,  
26 therefore obtaining a quantitative measure of the necessity of these metabolites even if  
27 concentrations are inaccessible.

## 28 29 **TOLERANCE PROFILES ACROSS ORGANISMS ARE EXPLAINED BY** 30 **SIMILAR METABOLIC RESPONSES**

31  
32 A comparison with other organisms can help evaluate the generality of the previous  
33 patterns (Methods, **Fig. S2**). The *Caenorhabditis elegans* metabolic response was very  
34 similar to that of yeast when the NADH/NAD<sup>+</sup> imbalance reaction was placed in the  
35 mitochondria. The preceding pseudohypoxic behavior followed tightly that found in the  
36 yeast model, and so did most of the oxidative response. The only difference was that  
37 during very extreme oxidative imbalances the worm model drew heavily on a partial

38 reverse configuration of the Krebs cycle (sometimes referred to as the glyoxylate cycle)  
39 (**Figs. S2A-B**).

40

41 The response of the worm model to cytosolic imbalances diverged slightly more from  
42 that of *S. cerevisiae*. For once, glutamine metabolism did not change much from its  
43 normal level under any point of the tolerance profile. Some features however did emerge  
44 in a similar fashion, like the increased glycolysis to Krebs cycle ratio in response to NAD<sup>+</sup>  
45 reduction, and the elevated gluconeogenesis, pentose phosphate and oxidative  
46 phosphorylation flux following NADH oxidation (**Figs. S2A-B**).

47

48 In the case of the more intricate human metabolic network, we obtained a much wider  
49 tolerance profile, which made for more elaborate metabolic strategies and a more  
50 diverse response (**Figs. S2C-D**). However, some tendencies emerged that recover  
51 many of the patterns already described. Yet, the human recon differs from the other  
52 models in that these changes are far tamer, with fluxes rising and declining within a  
53 10% to 2-fold of the normal reaction rates (compared to the much broader changes in  
54 *S. cerevisiae* and *C. elegans*).

55

56 Between more or less advanced models of the same organism, more specifically yeast  
57 (yeast 5, yeast 6, iND750, iMM904, iAZ900, yeast 7 and yeast 8), results varied to an  
58 extent. The speed at which pseudohypoxic metabolism deploys with reductive  
59 imbalance differed, and the specific tolerances of the model were slightly different. The  
60 late oxidative regime was only present in yeast 4-6 and iAZ900, but not in iND750 and  
61 the supposedly more predictive yeast7 to 8, suggesting it may be an artifact. It may be  
62 counterintuitive for a richer network to result in a loss of function, but more demanding  
63 biomass pseudo reactions such as that present in yeast 8 ('r\_4041') could make the  
64 late oxidative growth unfeasible.

65

66

## 67 **ALTERNATIVE SOLUTIONS AND NUTRIENT DEPENDENCE**

68 FBA provides alternative solutions for certain environmental conditions, and to every  
69 calculation there is always a certain flux variability that can be estimated through flux  
70 variability analysis. Throughout our study, we noted that the tolerance profile is very  
71 robust, representing a very restricted range of feasible solutions for each redox  
72 imbalance condition. The growth rate of yeast under imbalance seemed to be not only  
73 a phenotype convergent across different flux distributions presented by different

74 organism models, but also convergent to different flux distributions due to variability in  
75 feasible enzyme reaction rates. This is so since, while alternative solutions for the  
76 tolerance profile were notoriously absent, alternative solutions for particular reaction  
77 fluxes lying underneath were very much a thing. It is however worth mentioning that  
78 tolerance profiles calculated in earlier yeast models, like iND750, did include alternative  
79 solutions for the tolerance profile. Such alternative solutions were conservative in  
80 shape for the most part and sometimes were only feasible for some imbalance  
81 conditions, but not others. There were also some null solutions in those cases. More  
82 predictive models like iaz900, or yeastGEM 7 and 8, did not show this.

83

84 As for the alternative solutions to specific fluxes and sets of fluxes, they occur when a  
85 mode of metabolism can supply for another. These did not largely impact out study of  
86 the metabolic profile, since that was based on flux averaged through standardized  
87 metabolic pathways, and fringe alternative solutions often involve alternative metabolic  
88 configurations. Flux variability within the same model didn't change the conclusions of  
89 the flux analysis. The point where it did become a concern was when dealing with the  
90 nutrient study. Somewhat different alternative solutions here were pervasive and  
91 modified the dependence of the tolerant state on the main homeostatic nutrients. They  
92 introduced considerable changes in the dependence lines, mostly in terms of the  
93 slopes, and regime changes. That did not change the selection of nutrients overall, but  
94 it did change their priority and the scores of dependences to a reasonable (up to 60%  
95 above or below) degree. The solution we found for this was using a regressed mean of  
96 the flux variability distribution as an estimate of the actual dependence profile of a  
97 nutrient, so the ultimate scalar summary (the slope) accounted for alternative solutions.  
98 Alternative solutions are thus another reason why we used regressed linear  
99 approximations of the actual dependence profiles instead of the profiles themselves.

100

101

102

103

104

105

106

107

108

109 **Supplementary Figures**

110 **Figure S1: Tolerance profiles of different coenzymes in yeast, related to Figure 1.**

111 A) NADH/NAD<sup>+</sup>, cytosolic perturbation. B) NADH/NAD<sup>+</sup>, mitochondrial perturbation. C)

112 NADPH/NADP<sup>+</sup> cytosolic perturbation. D) NADPH/NADP<sup>+</sup>, mitochondrial perturbation.

113 E) Thioredoxin, cytosolic perturbation. F) Thioredoxin, mitochondrial perturbation.

114

115 **Figure S2. Metabolic signature of redox imbalance in different organisms, related**

116 **to Figure 2.** A) Pathway flux under NADH/NAD<sup>+</sup> cytosolic imbalance in the *C. elegans*

117 model iCEL1273. B) Pathway flux under NADH/NAD<sup>+</sup> mitochondrial imbalance in the

118 *C. elegans* model iCEL1273. C) Pathway flux under NADH/NAD<sup>+</sup> cytosolic imbalance

119 in the human metabolic reconstruction 2.02. D) Pathway flux under NADH/NAD<sup>+</sup>

120 mitochondrial imbalance in the human metabolic reconstruction 2.02.

121

122

**Fig S1****cytosol****mitochondria****A)**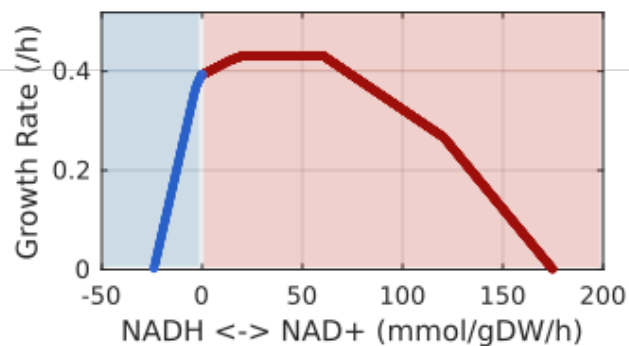**B)**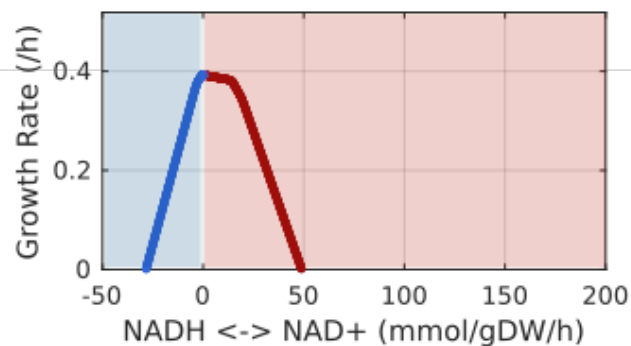**C)**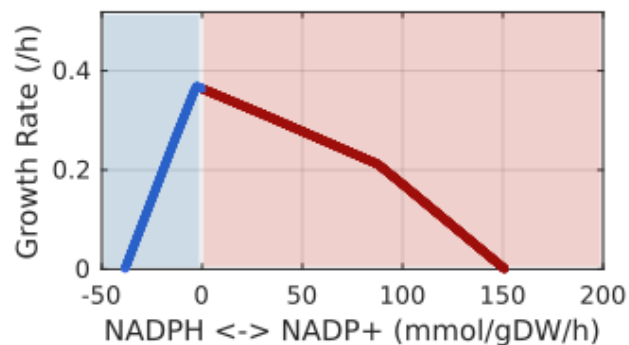**D)**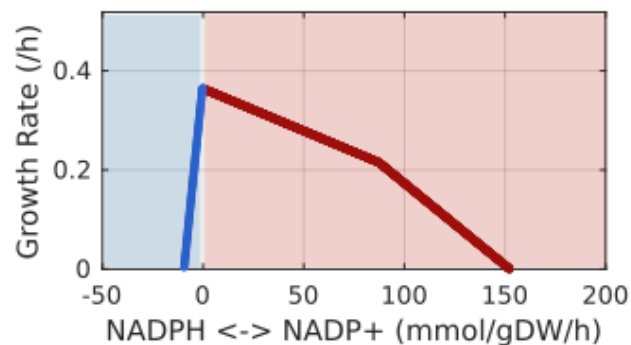**E)**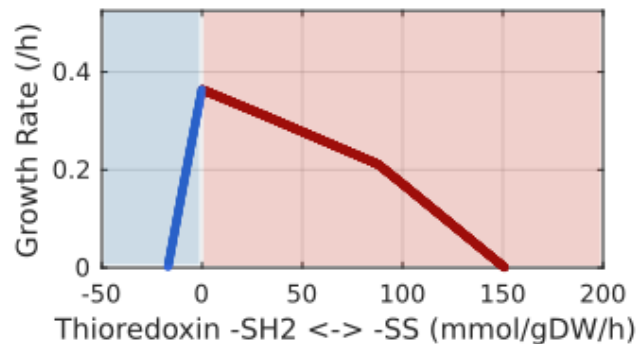**F)**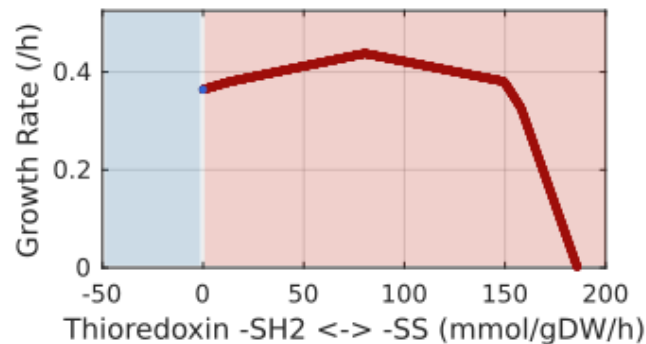

**Fig S2**

***C. elegans***  
*model iCEL1273*

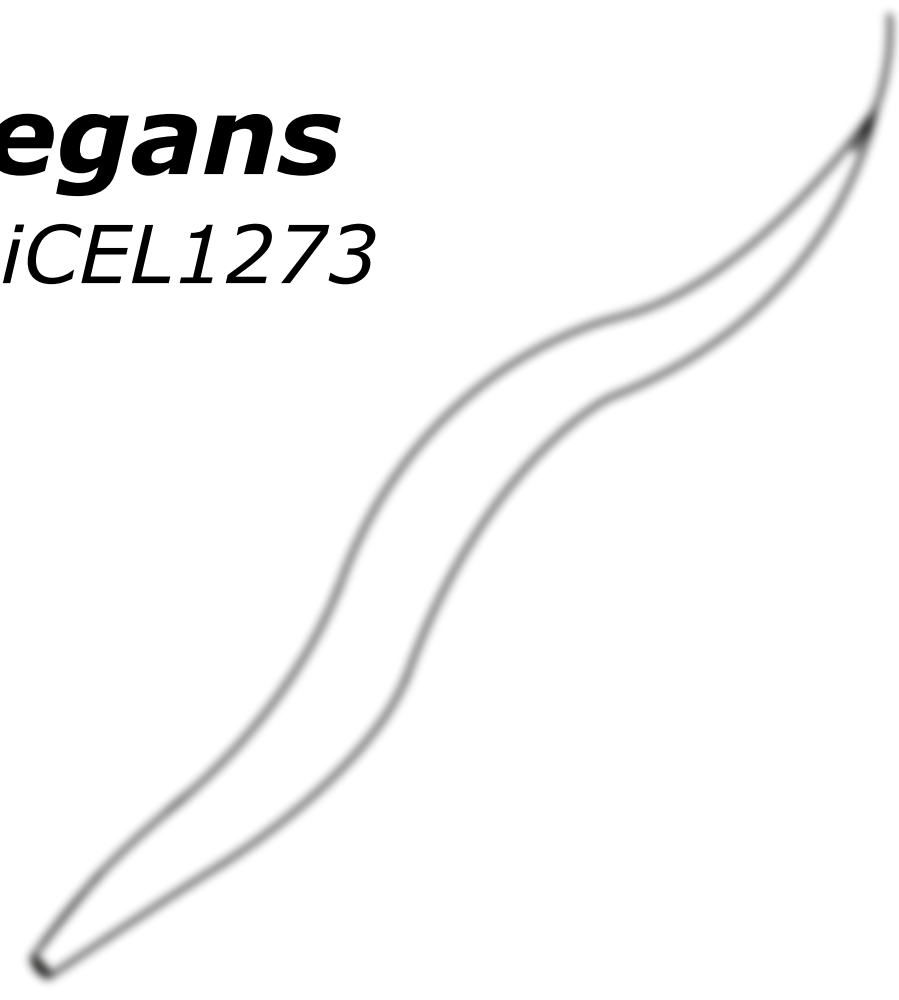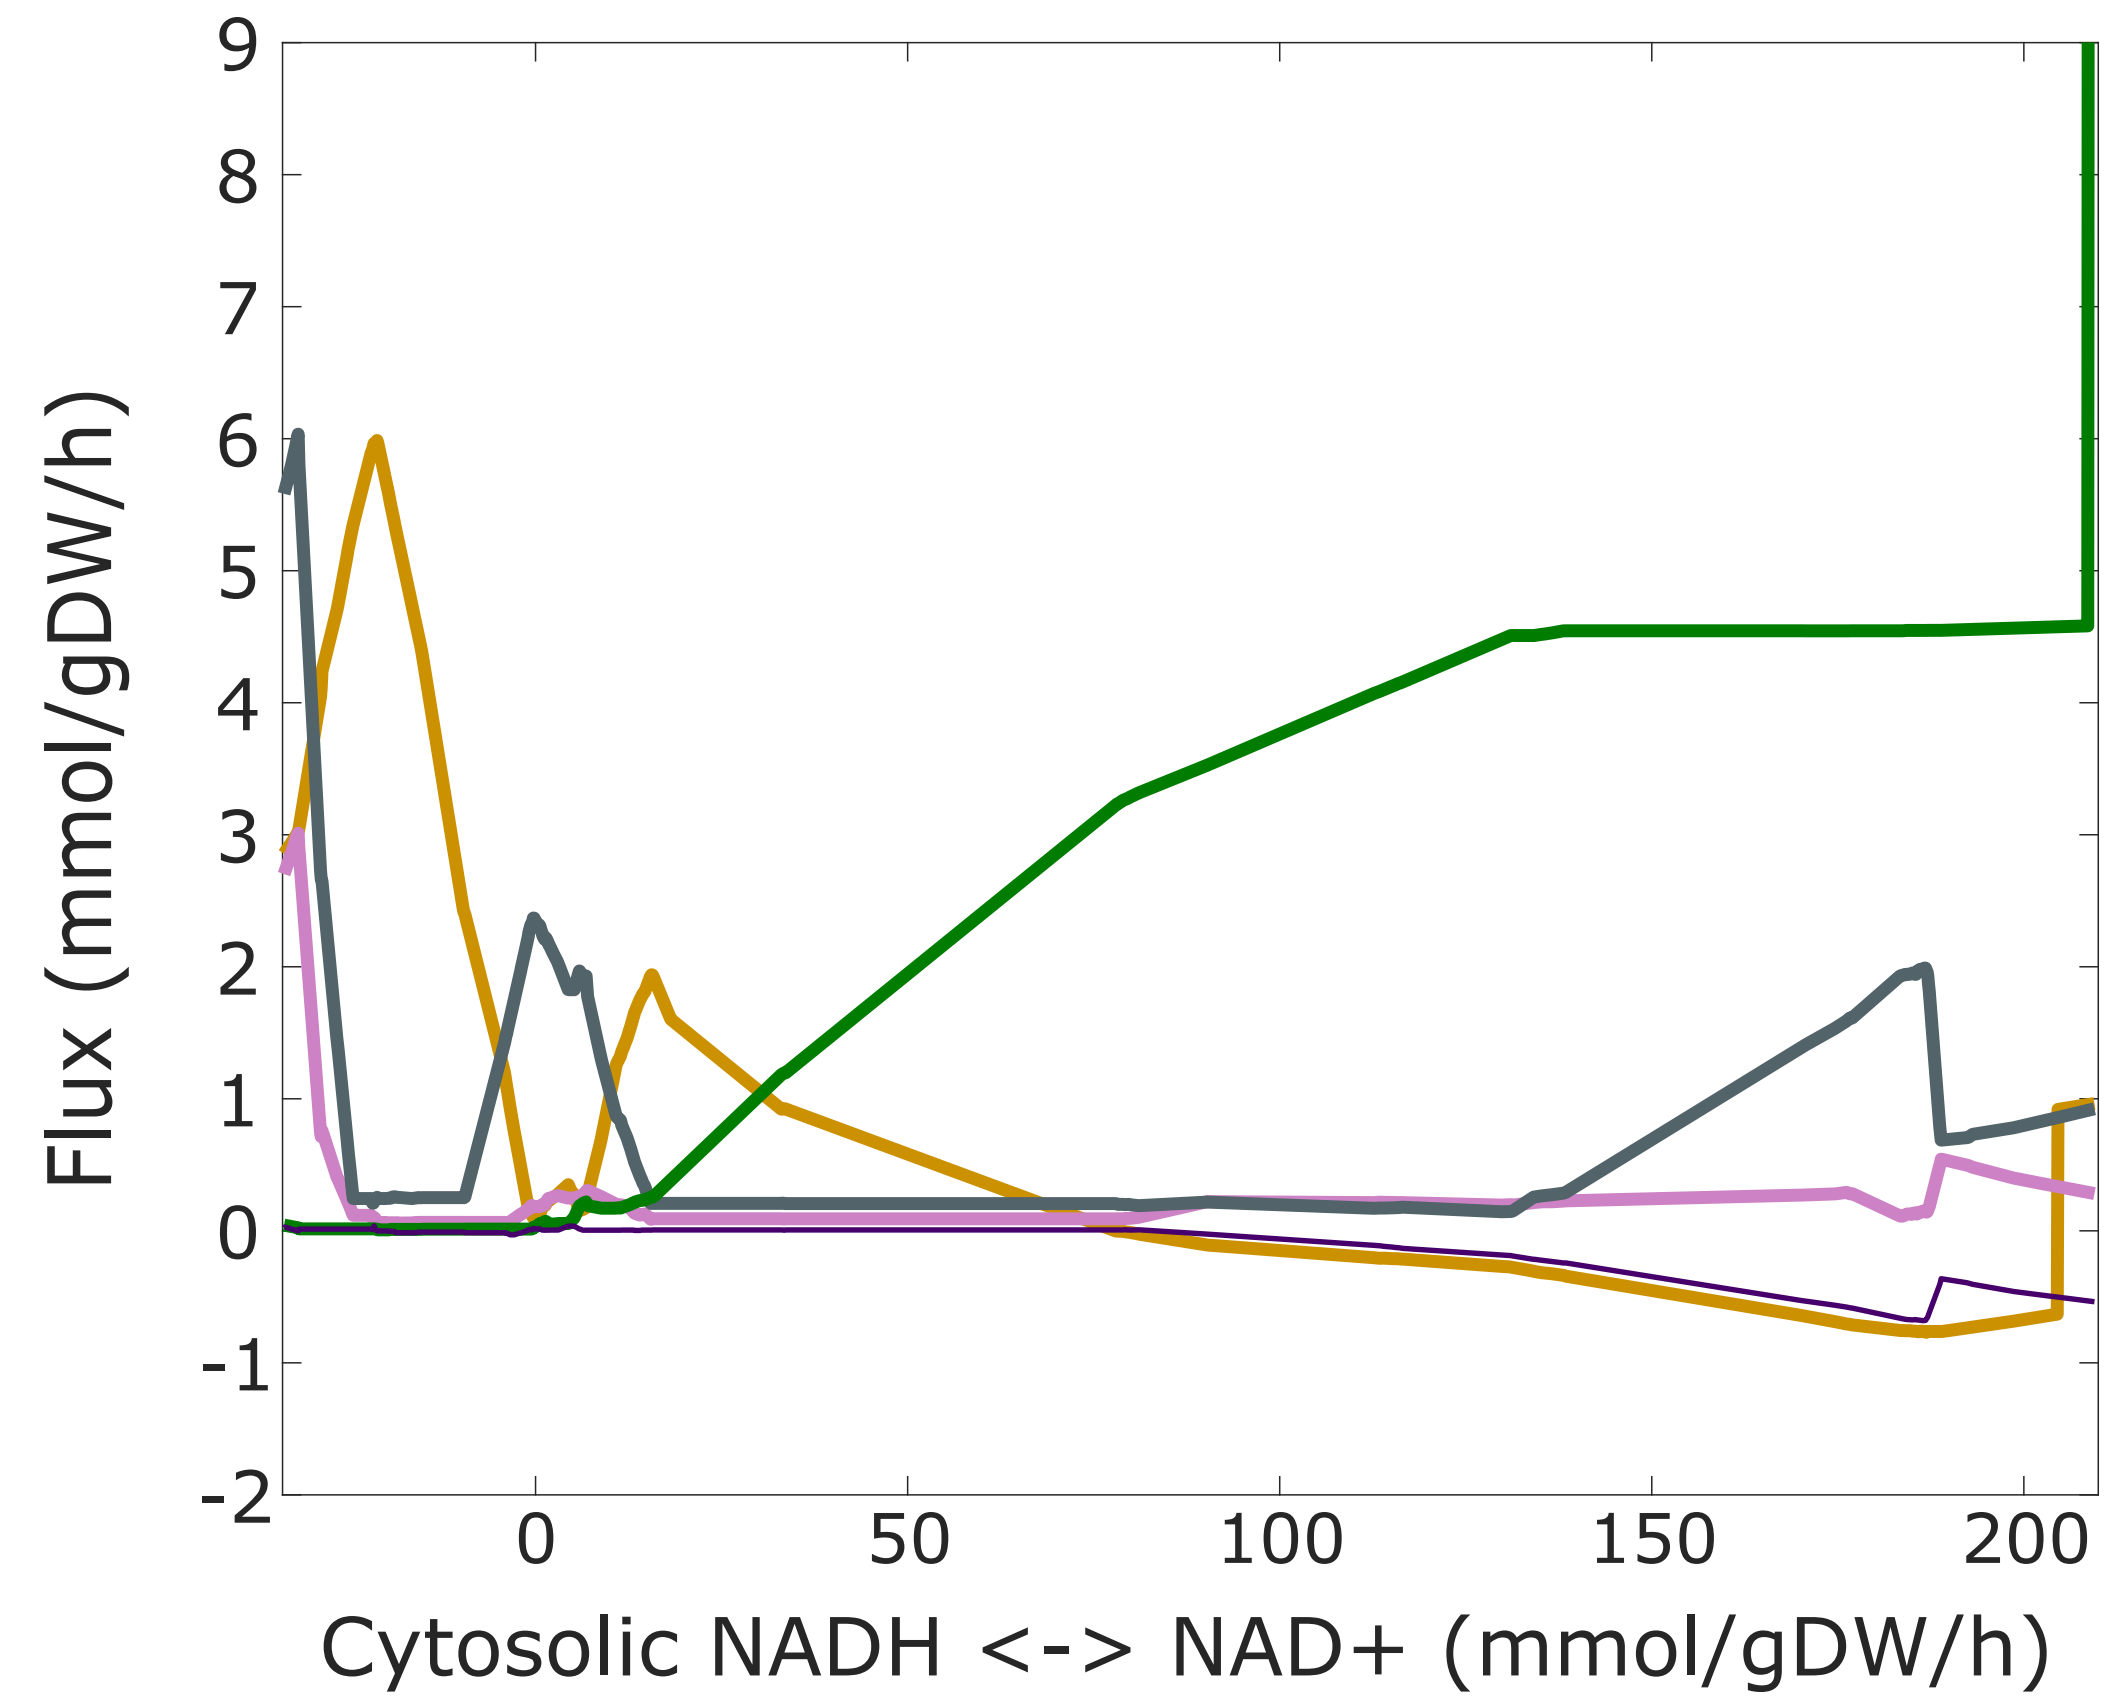

**MITOCHONDRIA**

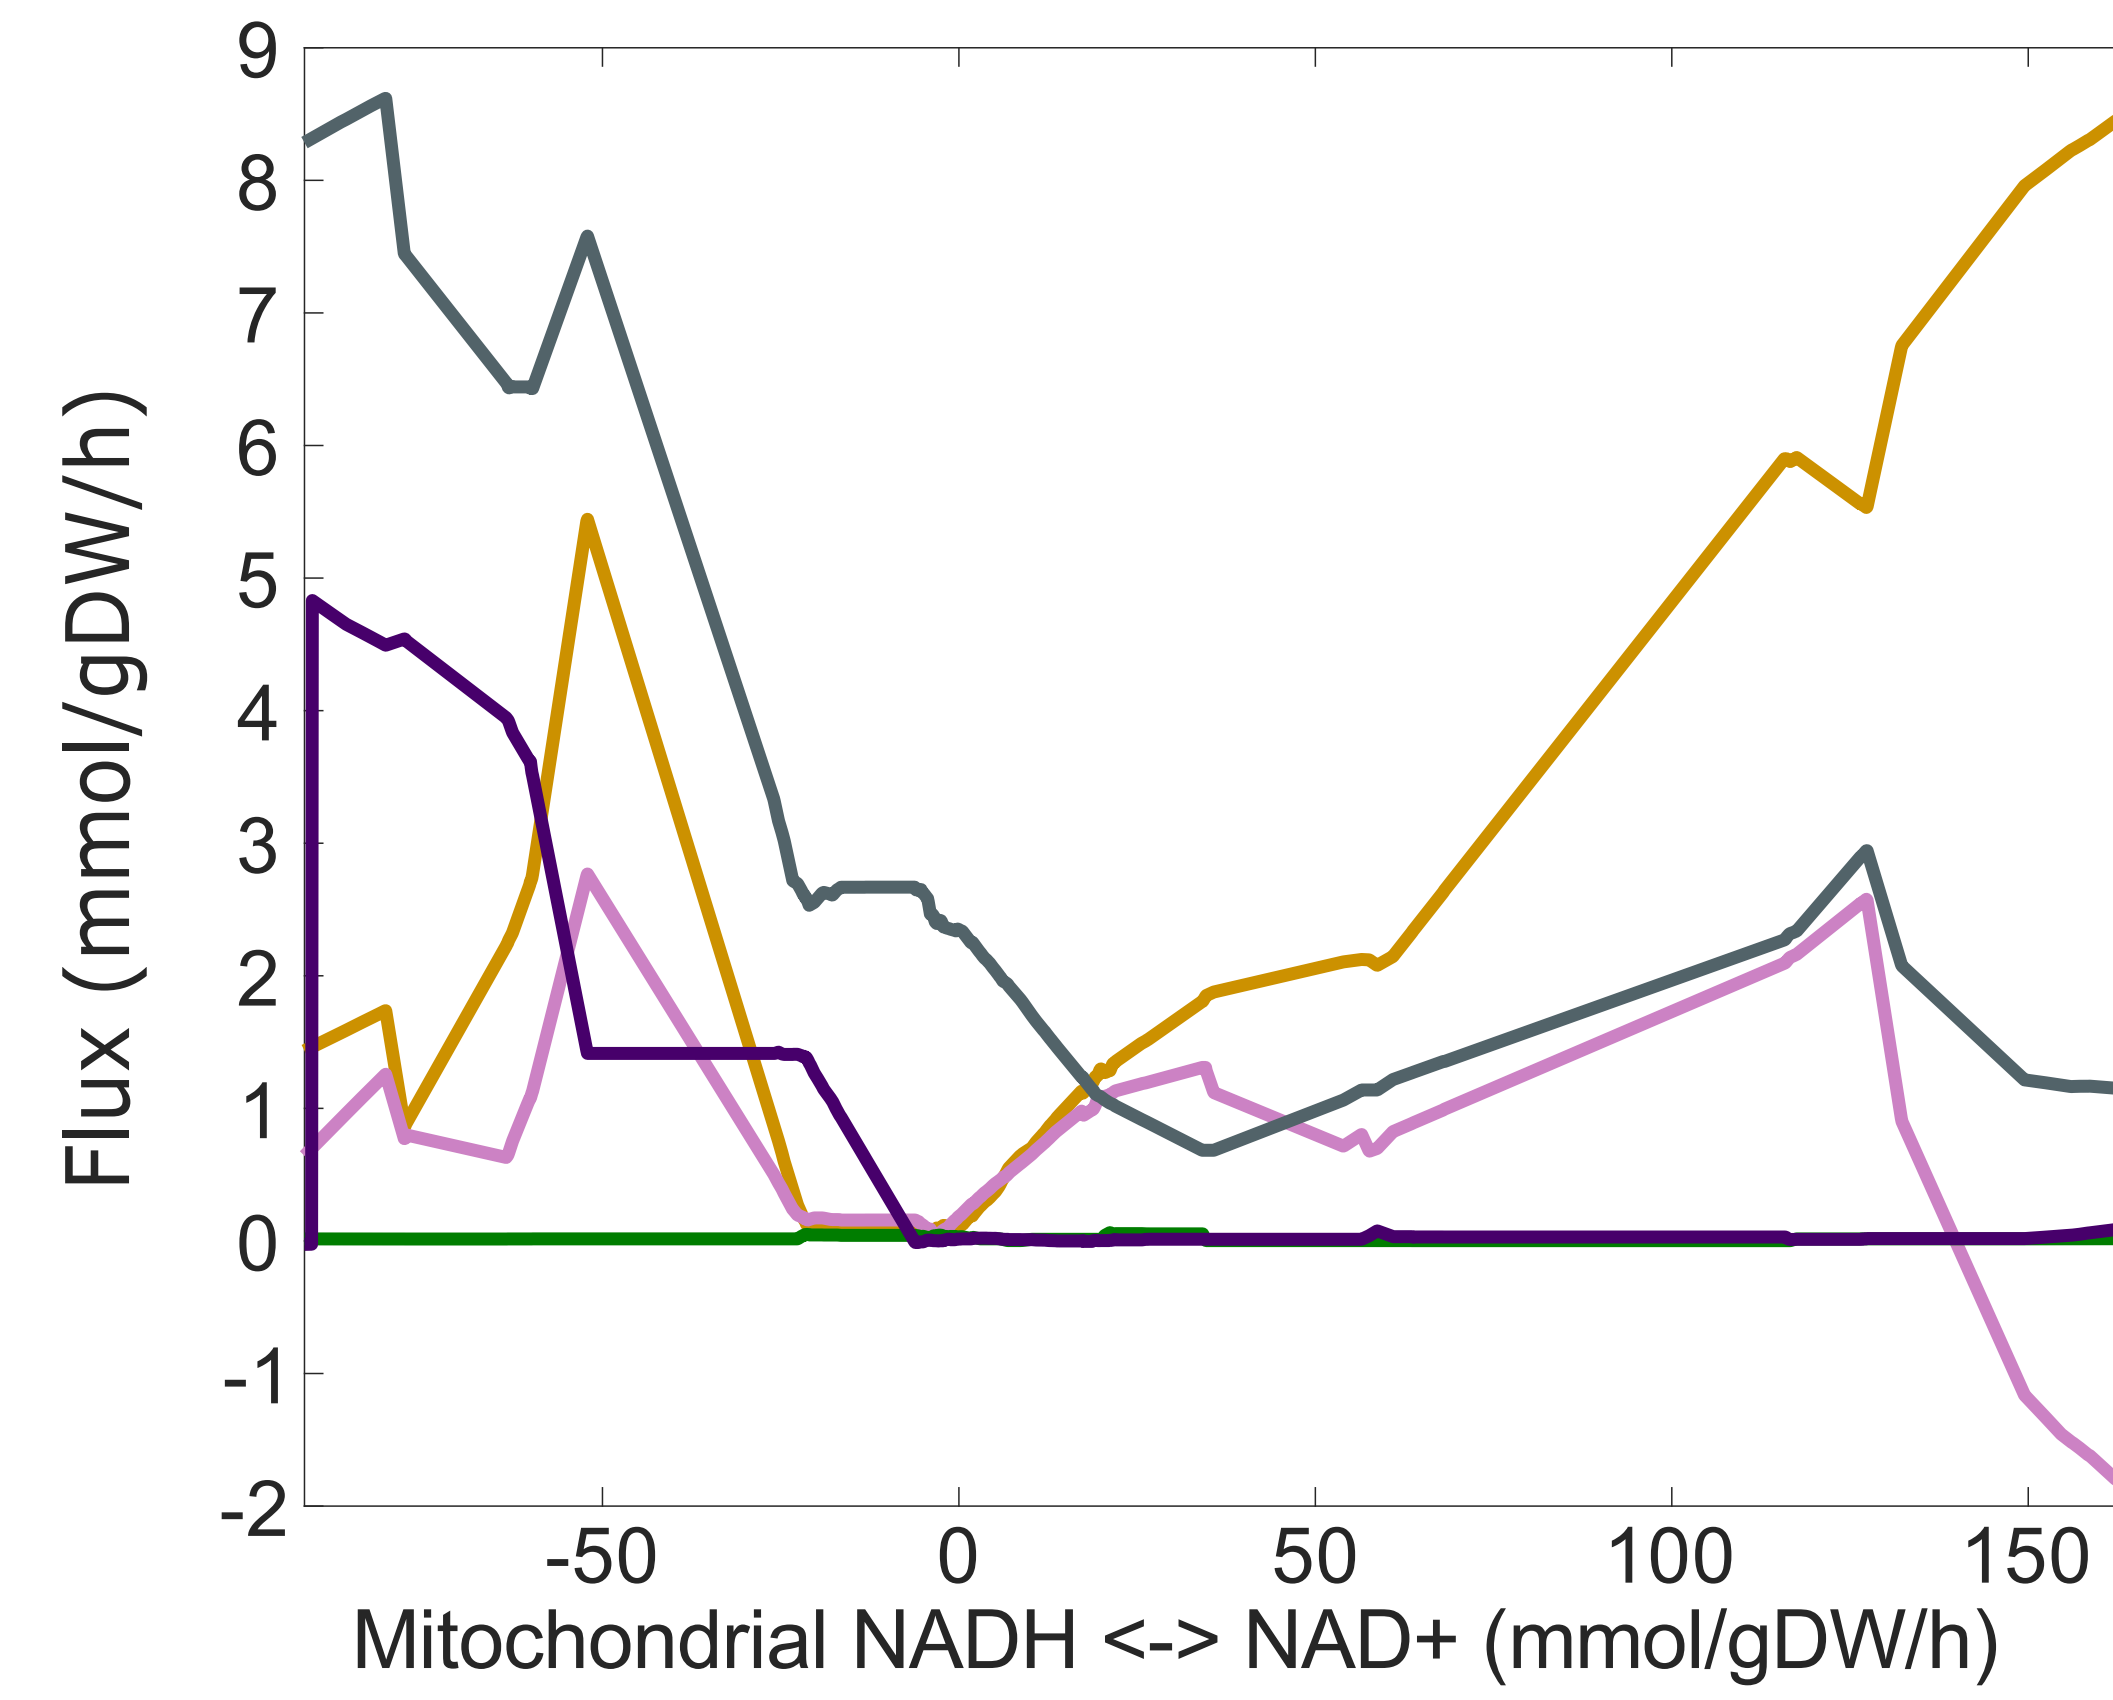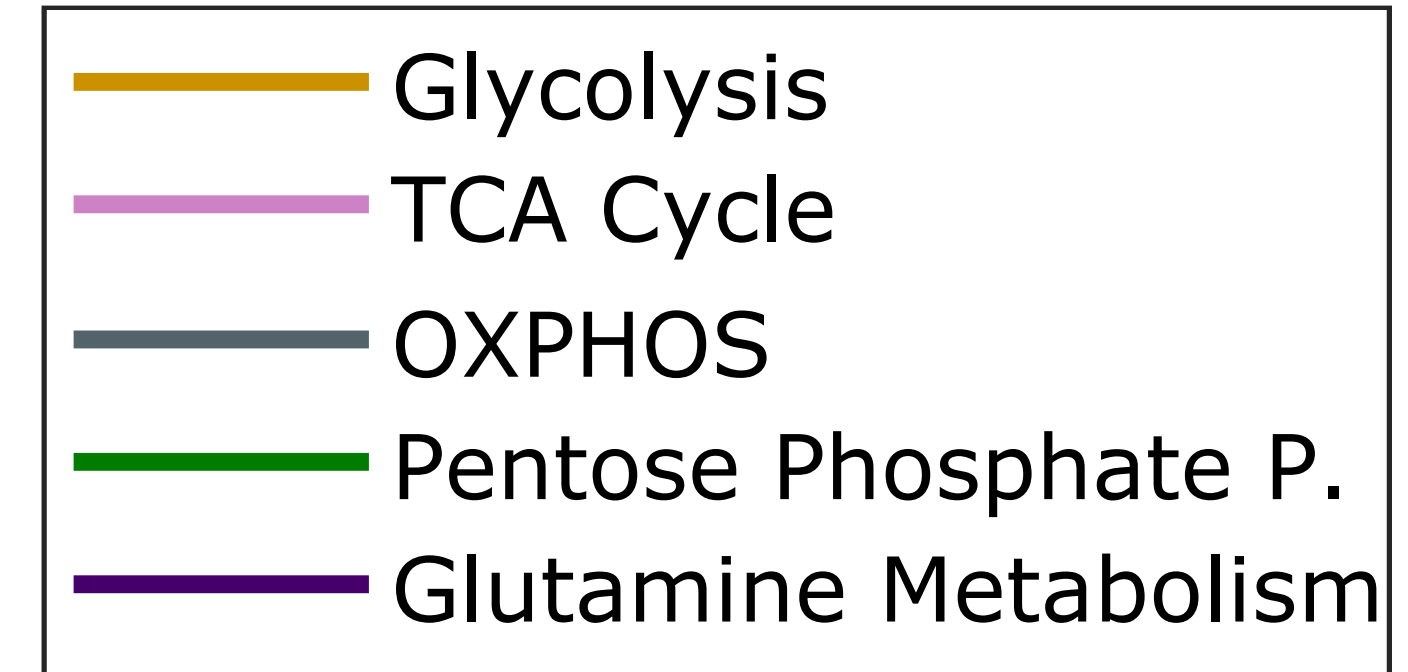

***H. sapiens***  
*recon 2.2*

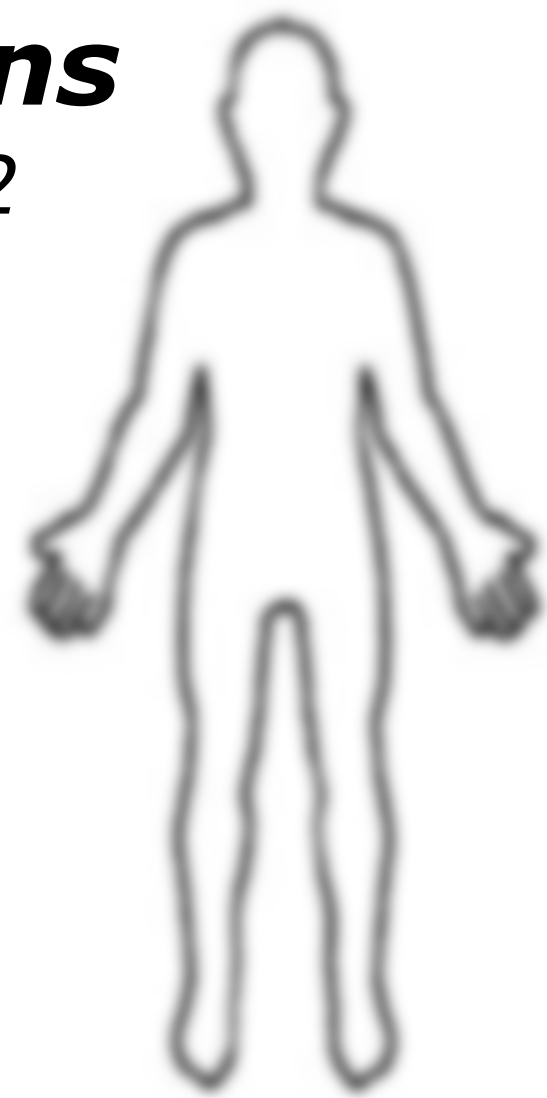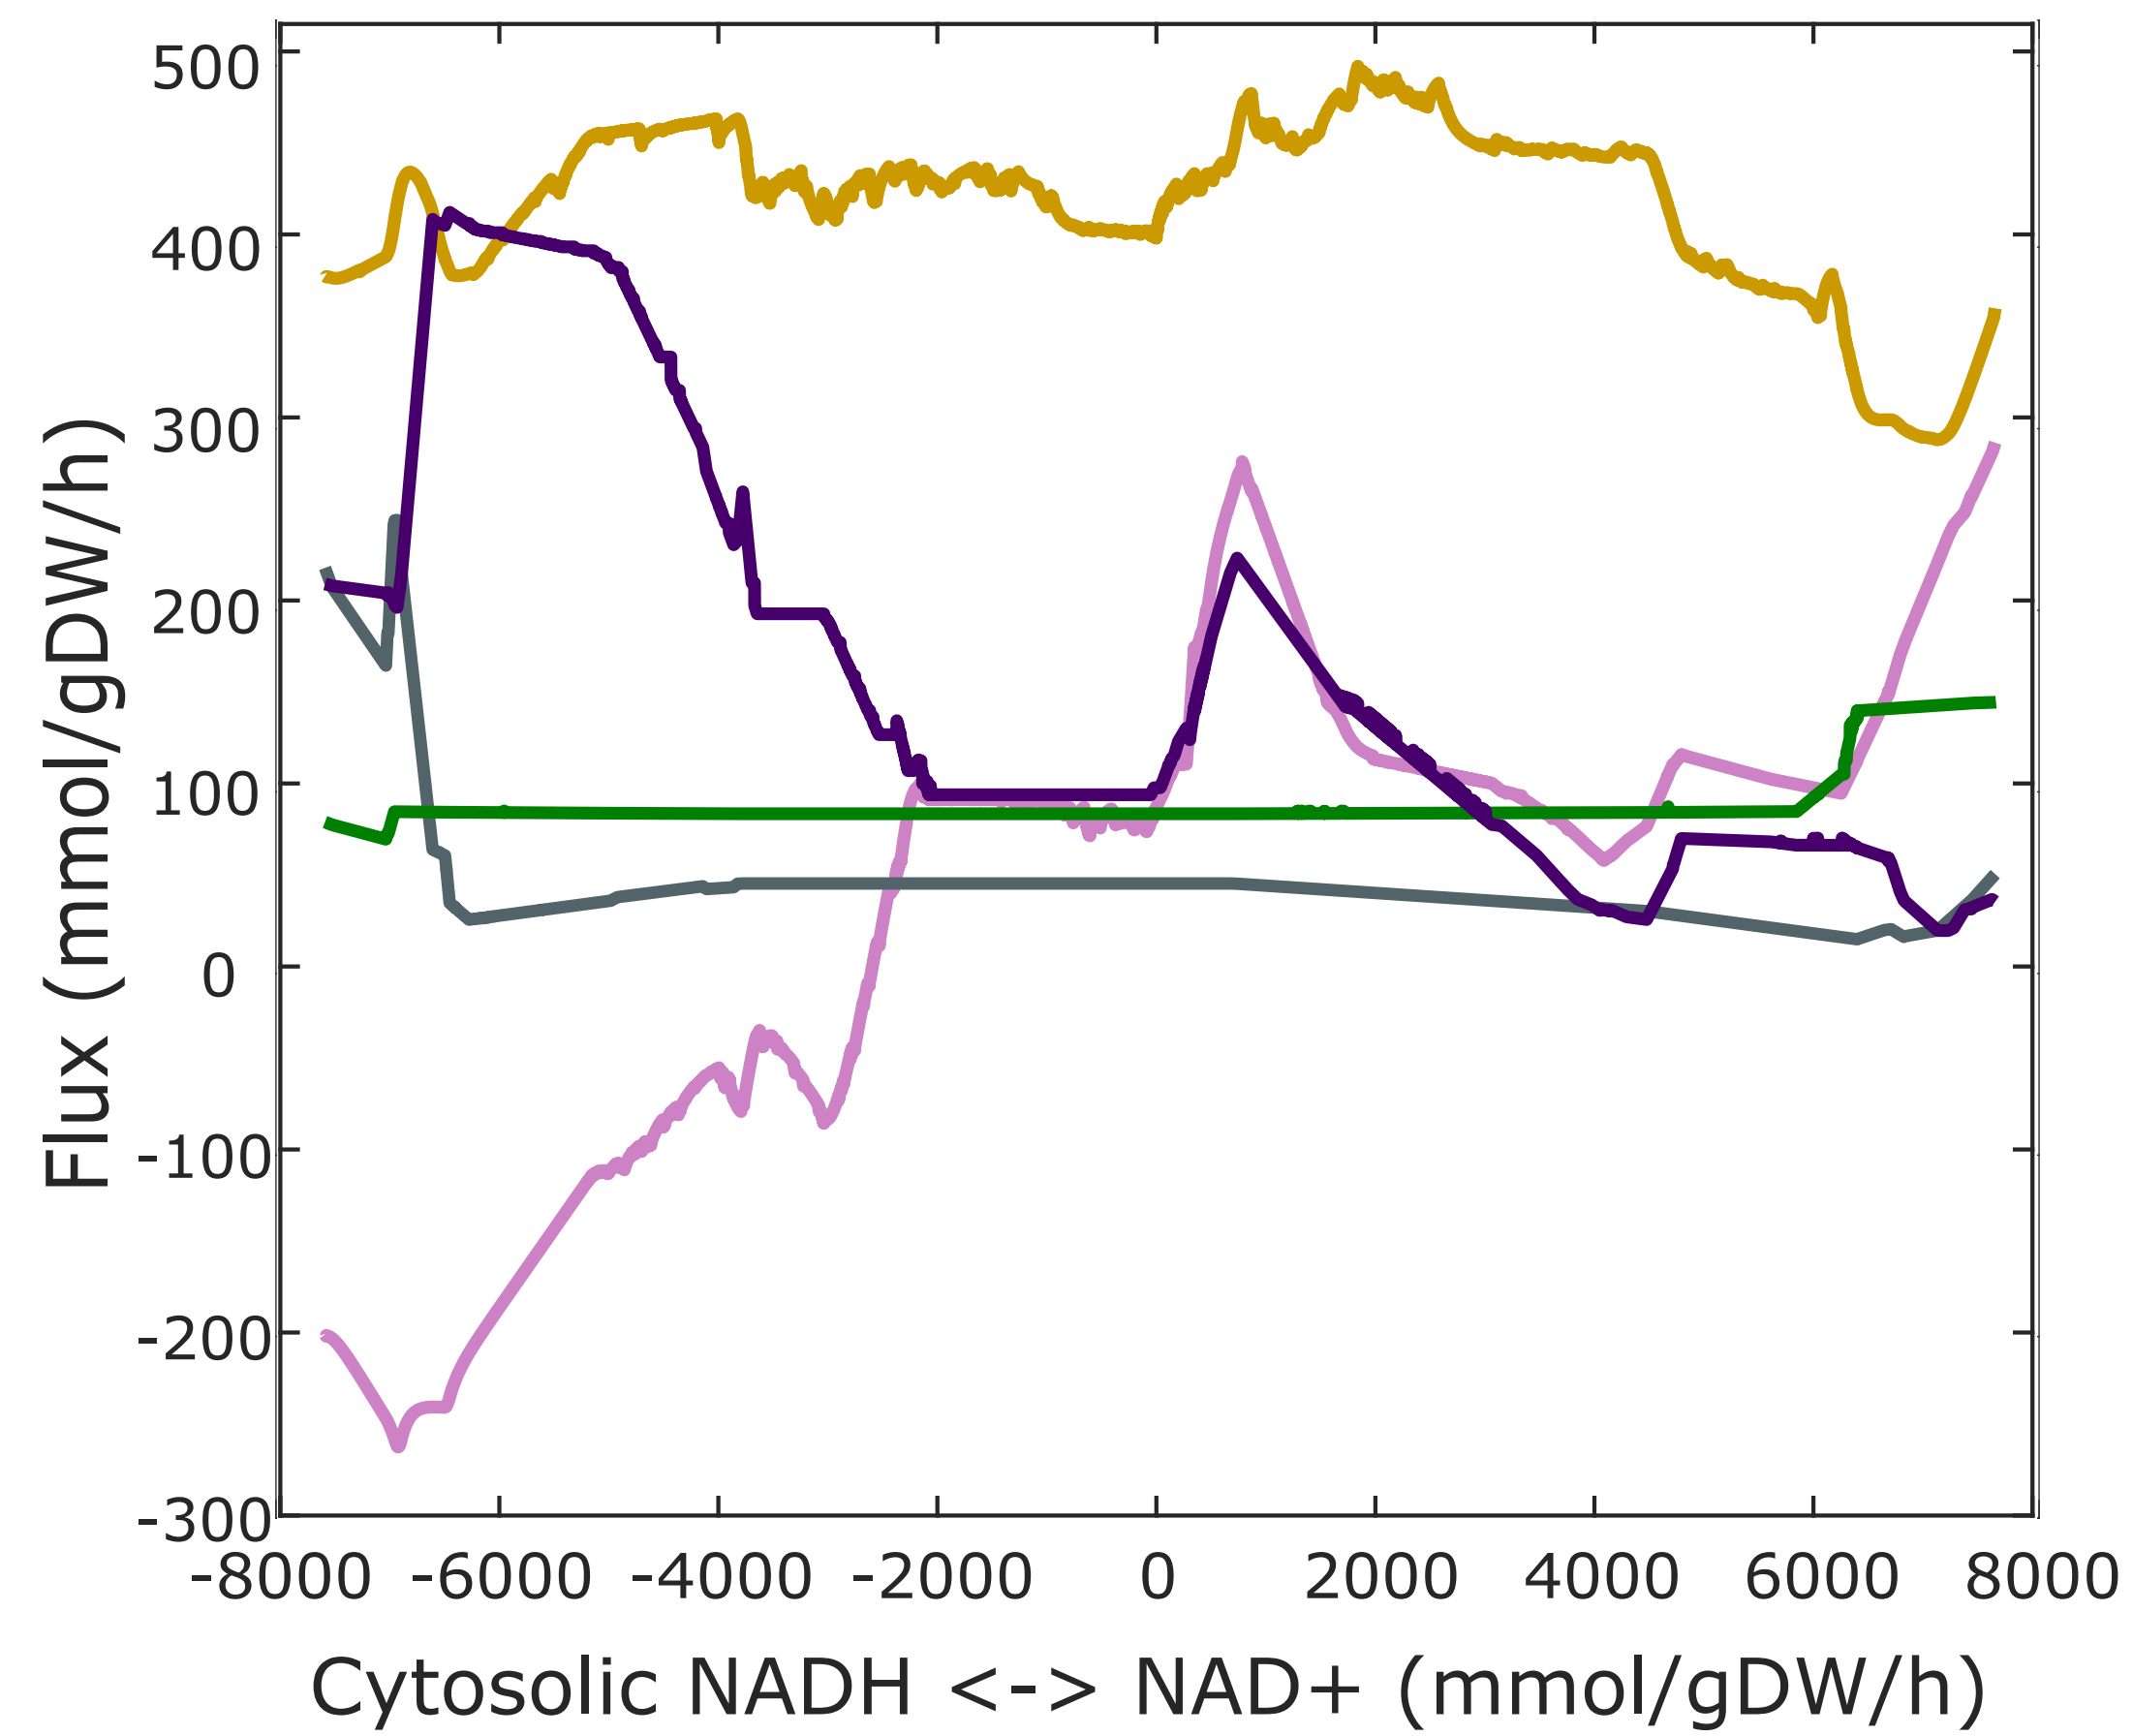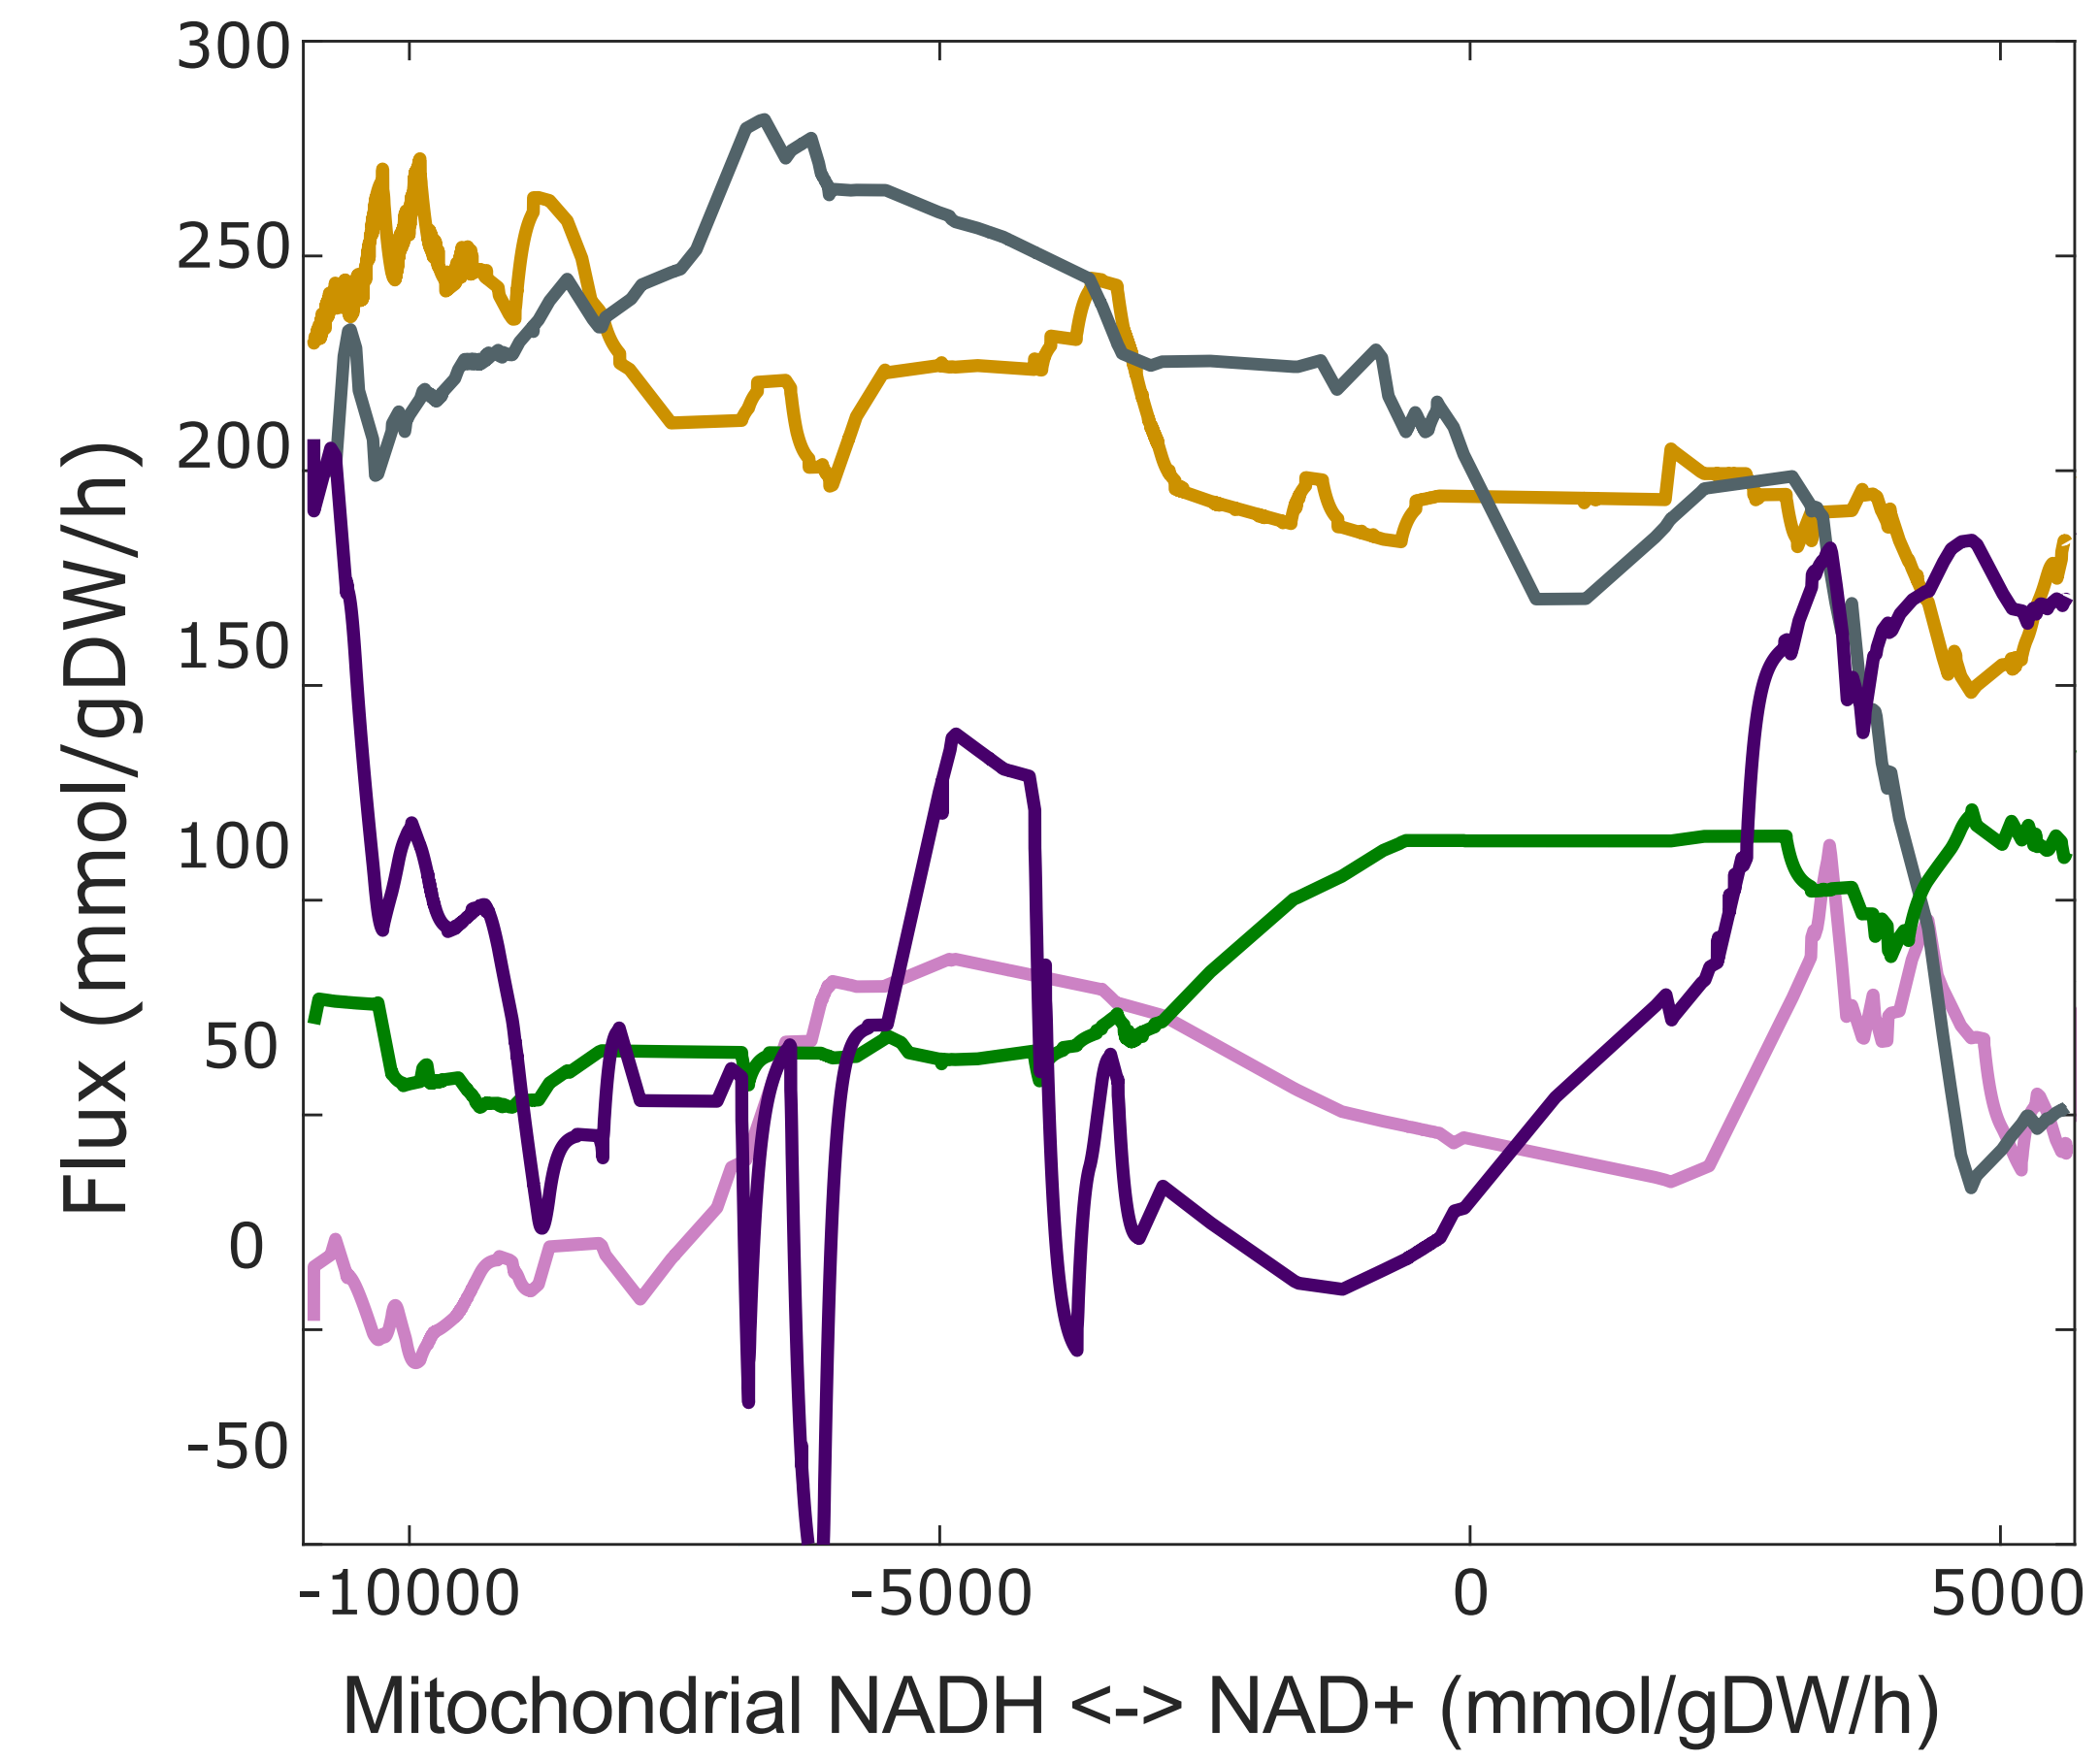

Supplement: mmc1.pdf [file mmc1.pdf]
